# Supplementary figures and images for: Robust route to photocatalytic nitrogen fixation mediated by capitalizing on defect-tailored InVO4 nanosheets
Source: Royal Society of Chemistry journal article supplement (doi:10.1039/d2en00205a), 2022-01-01

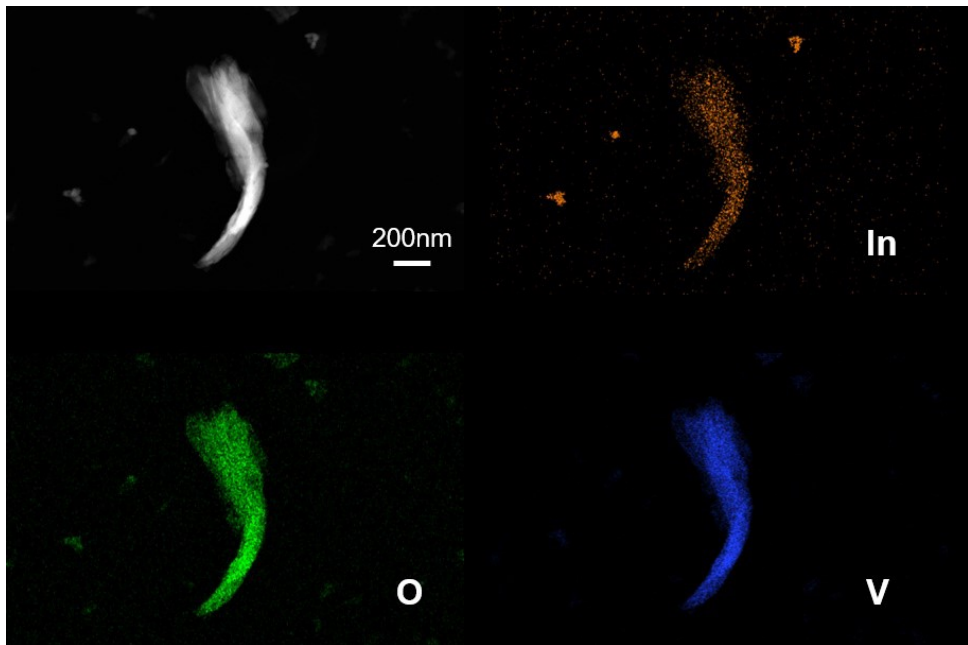

Supplement: d2en00205a10.pdf [file d2en00205a10.pdf]

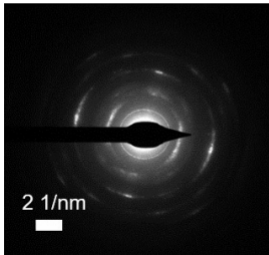

Supplement: d2en00205a11.pdf [file d2en00205a11.pdf]

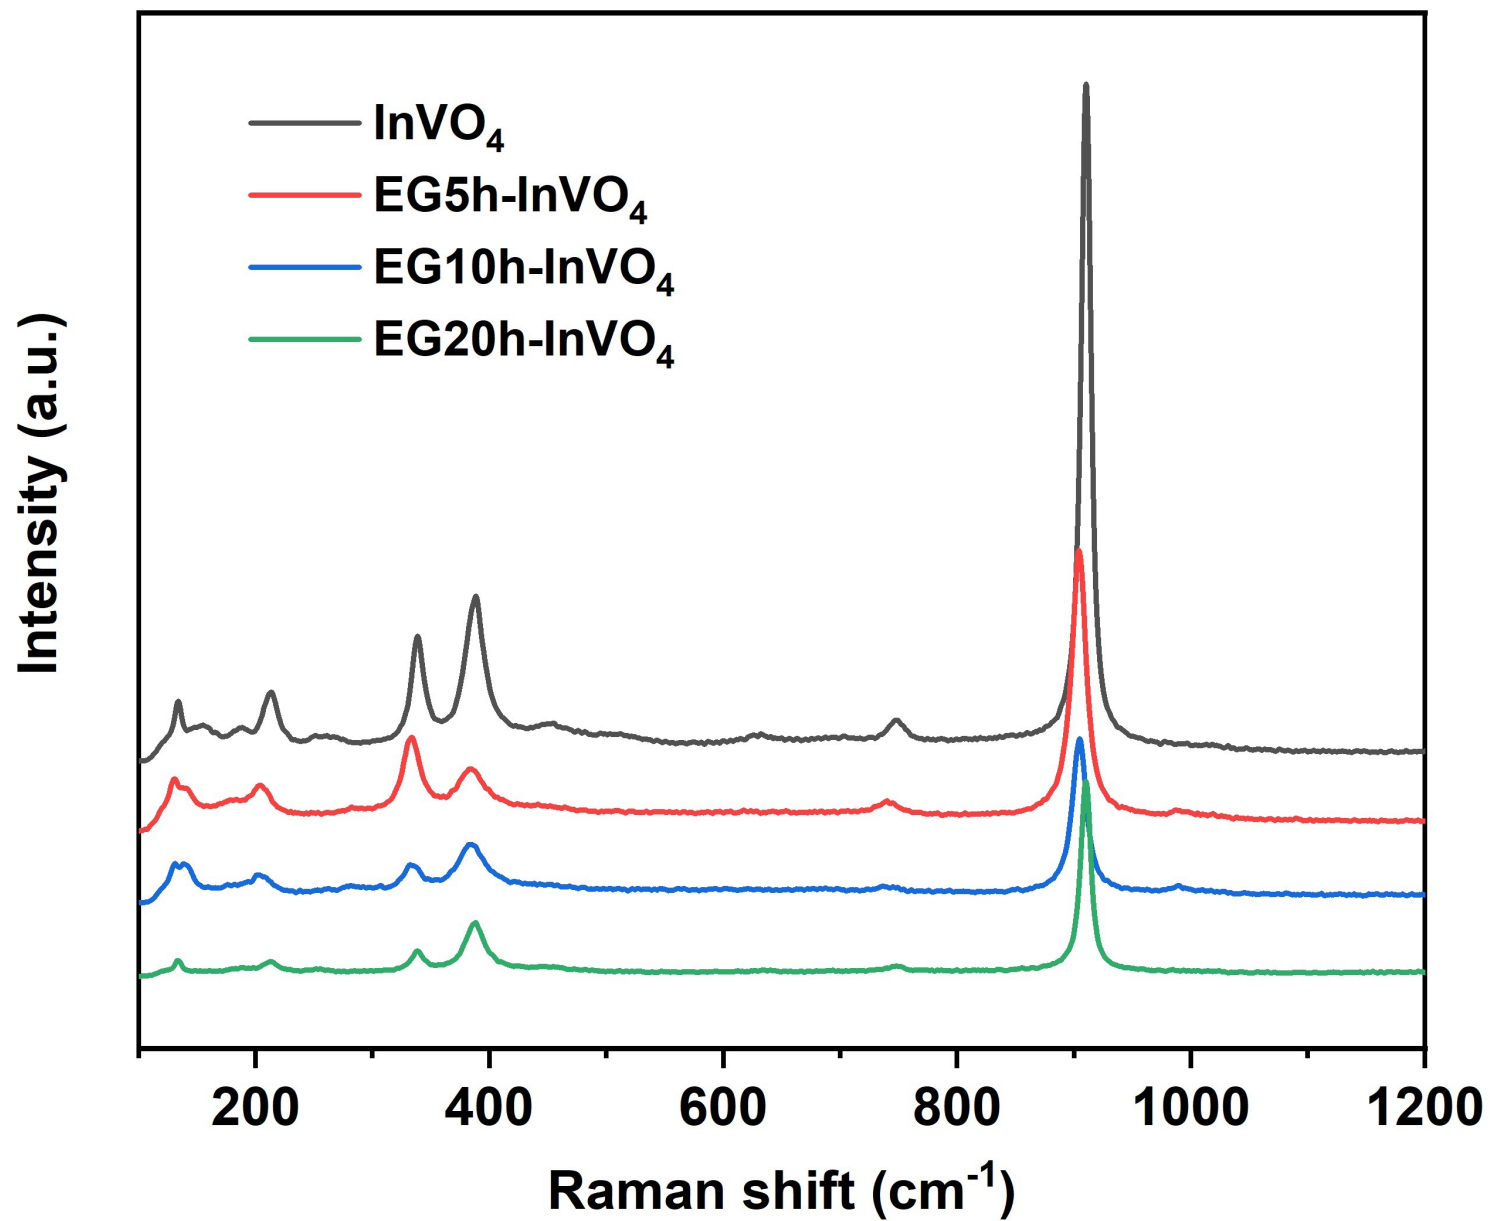

Supplement: d2en00205a12.pdf [file d2en00205a12.pdf]

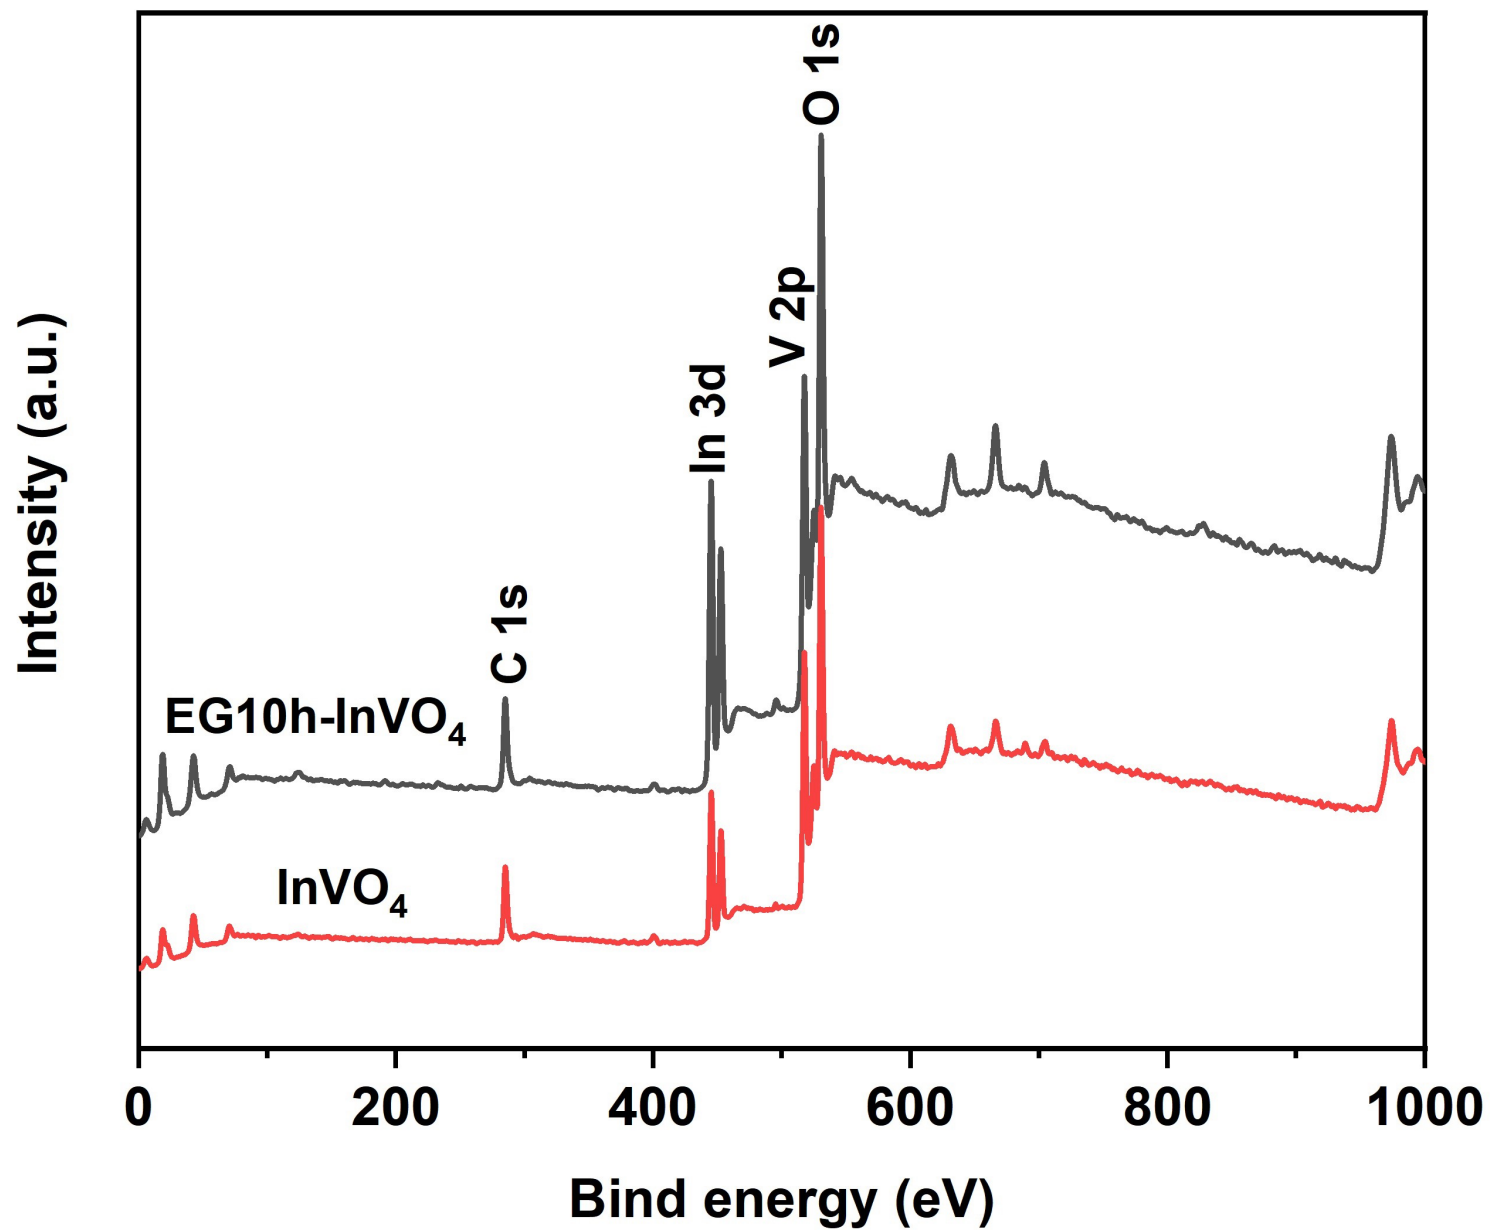

Supplement: d2en00205a13.pdf [file d2en00205a13.pdf]

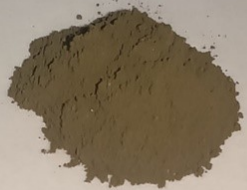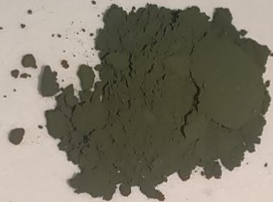

Supplement: d2en00205a15.pdf [file d2en00205a15.pdf]

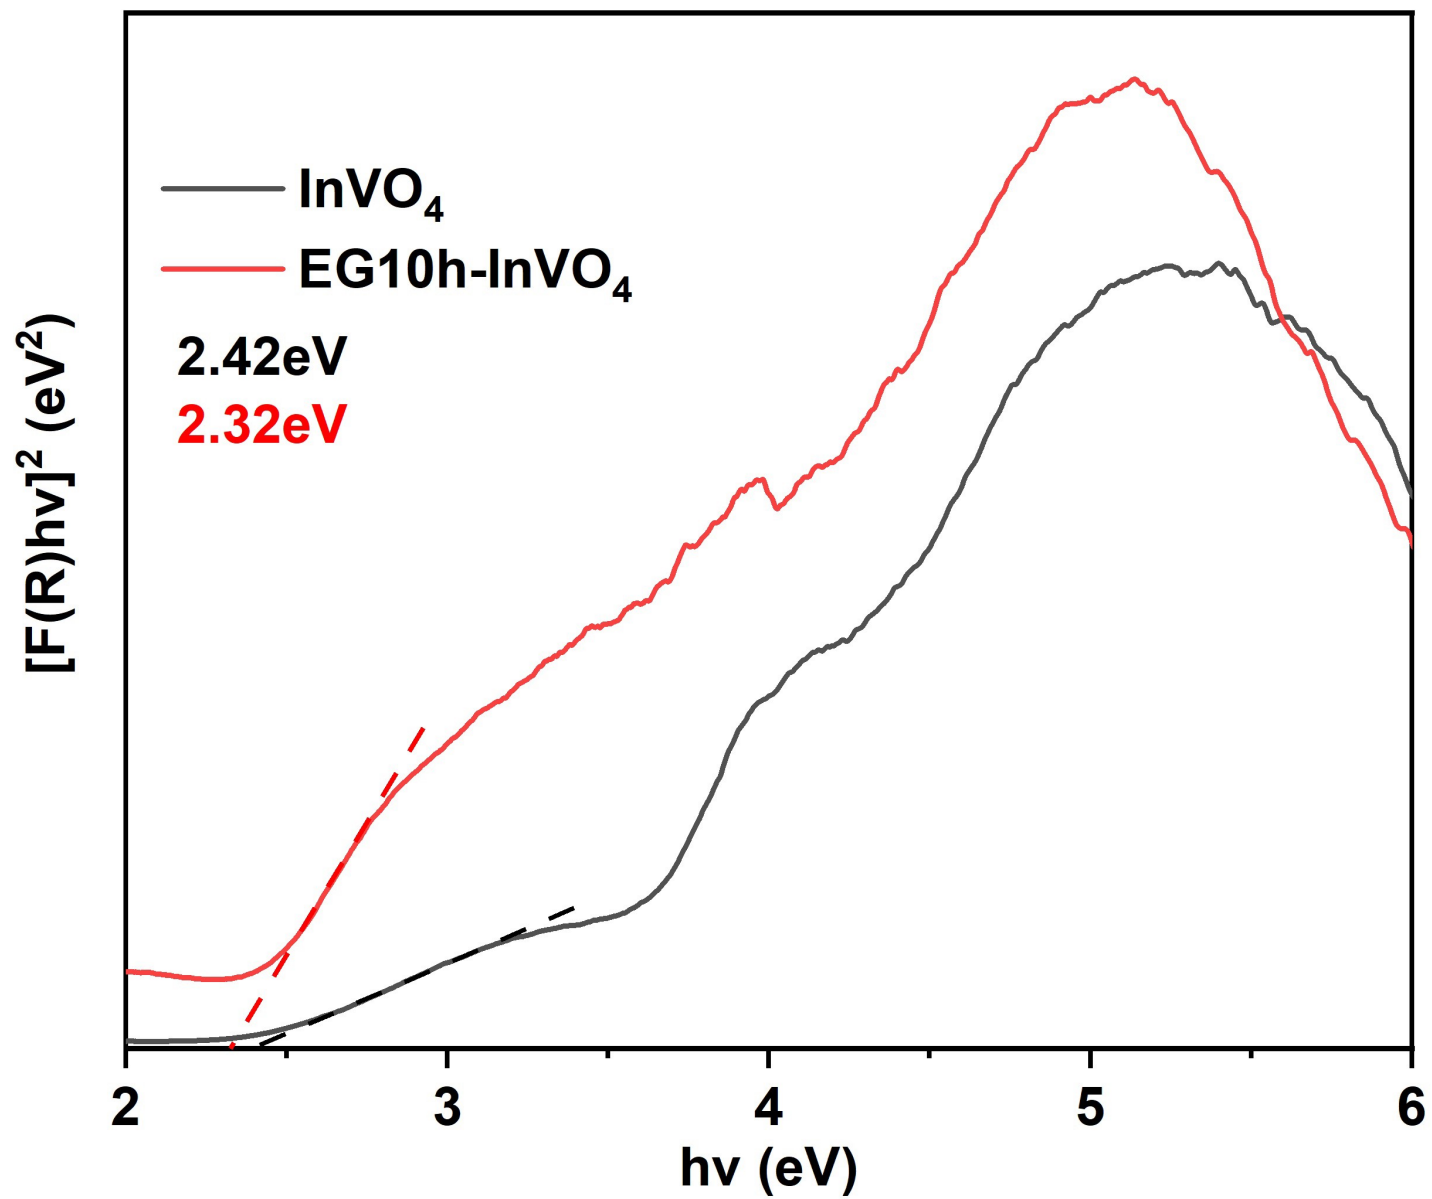

Supplement: d2en00205a4.pdf [file d2en00205a4.pdf]

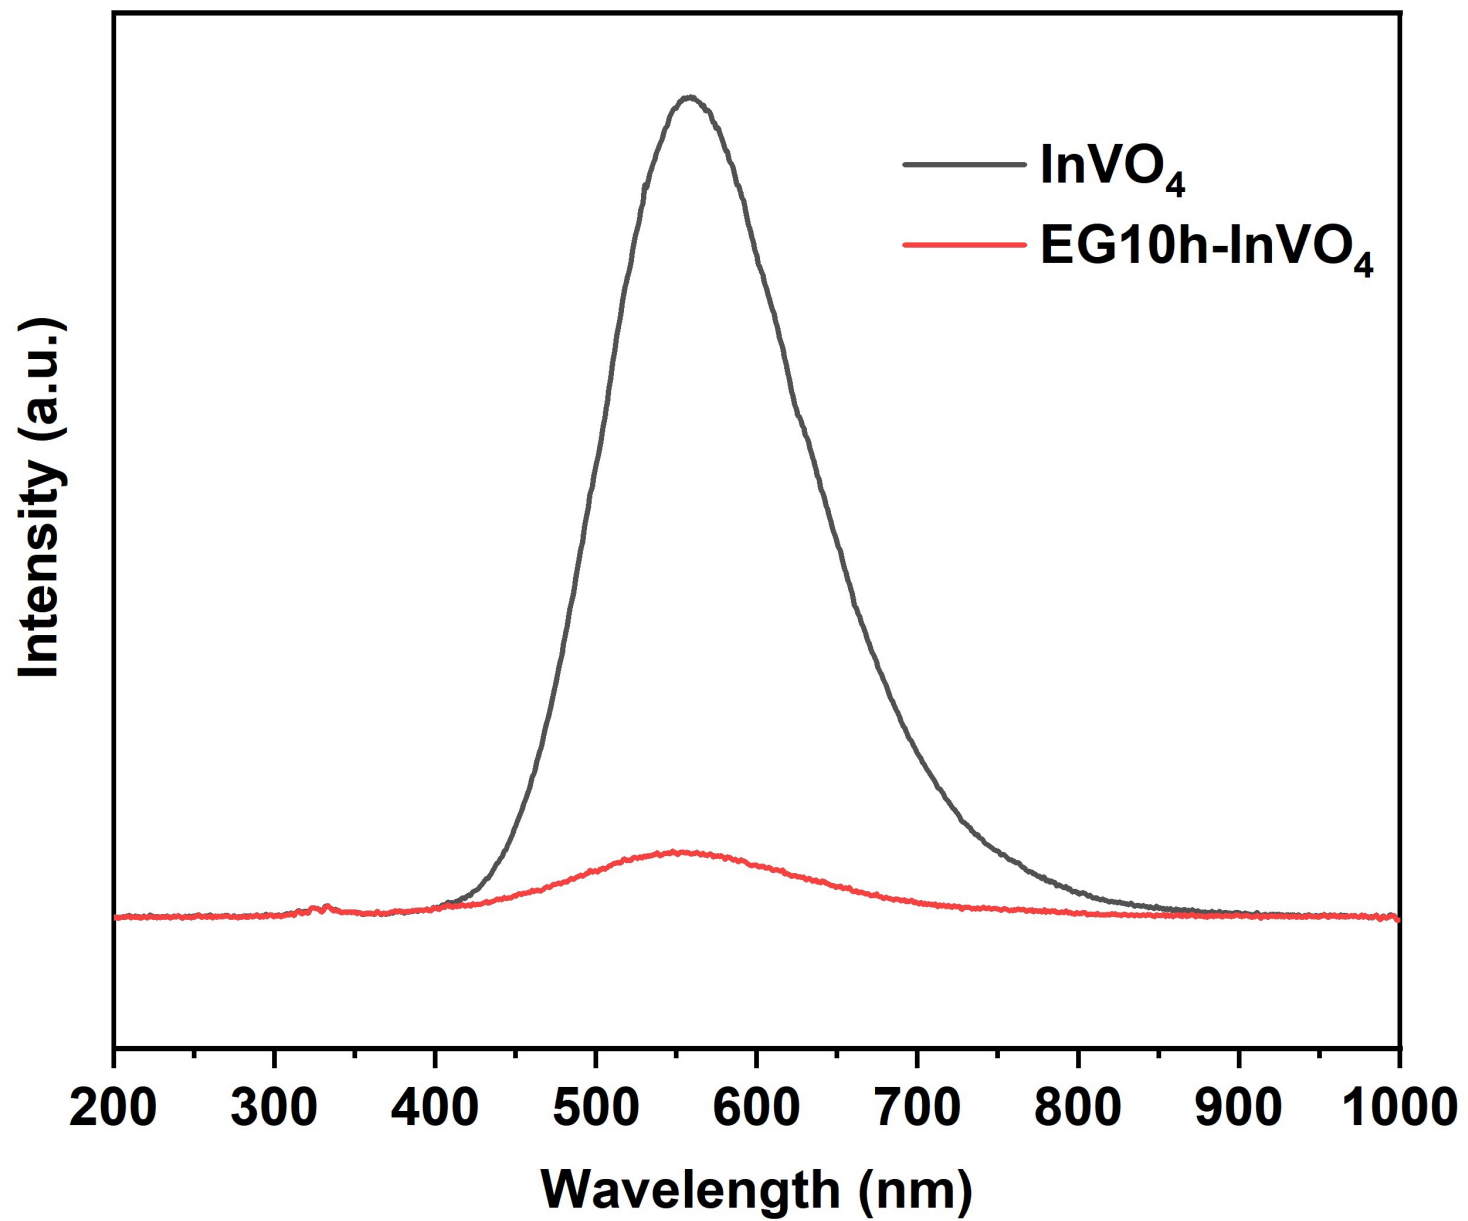

Supplement: d2en00205a5.pdf [file d2en00205a5.pdf]

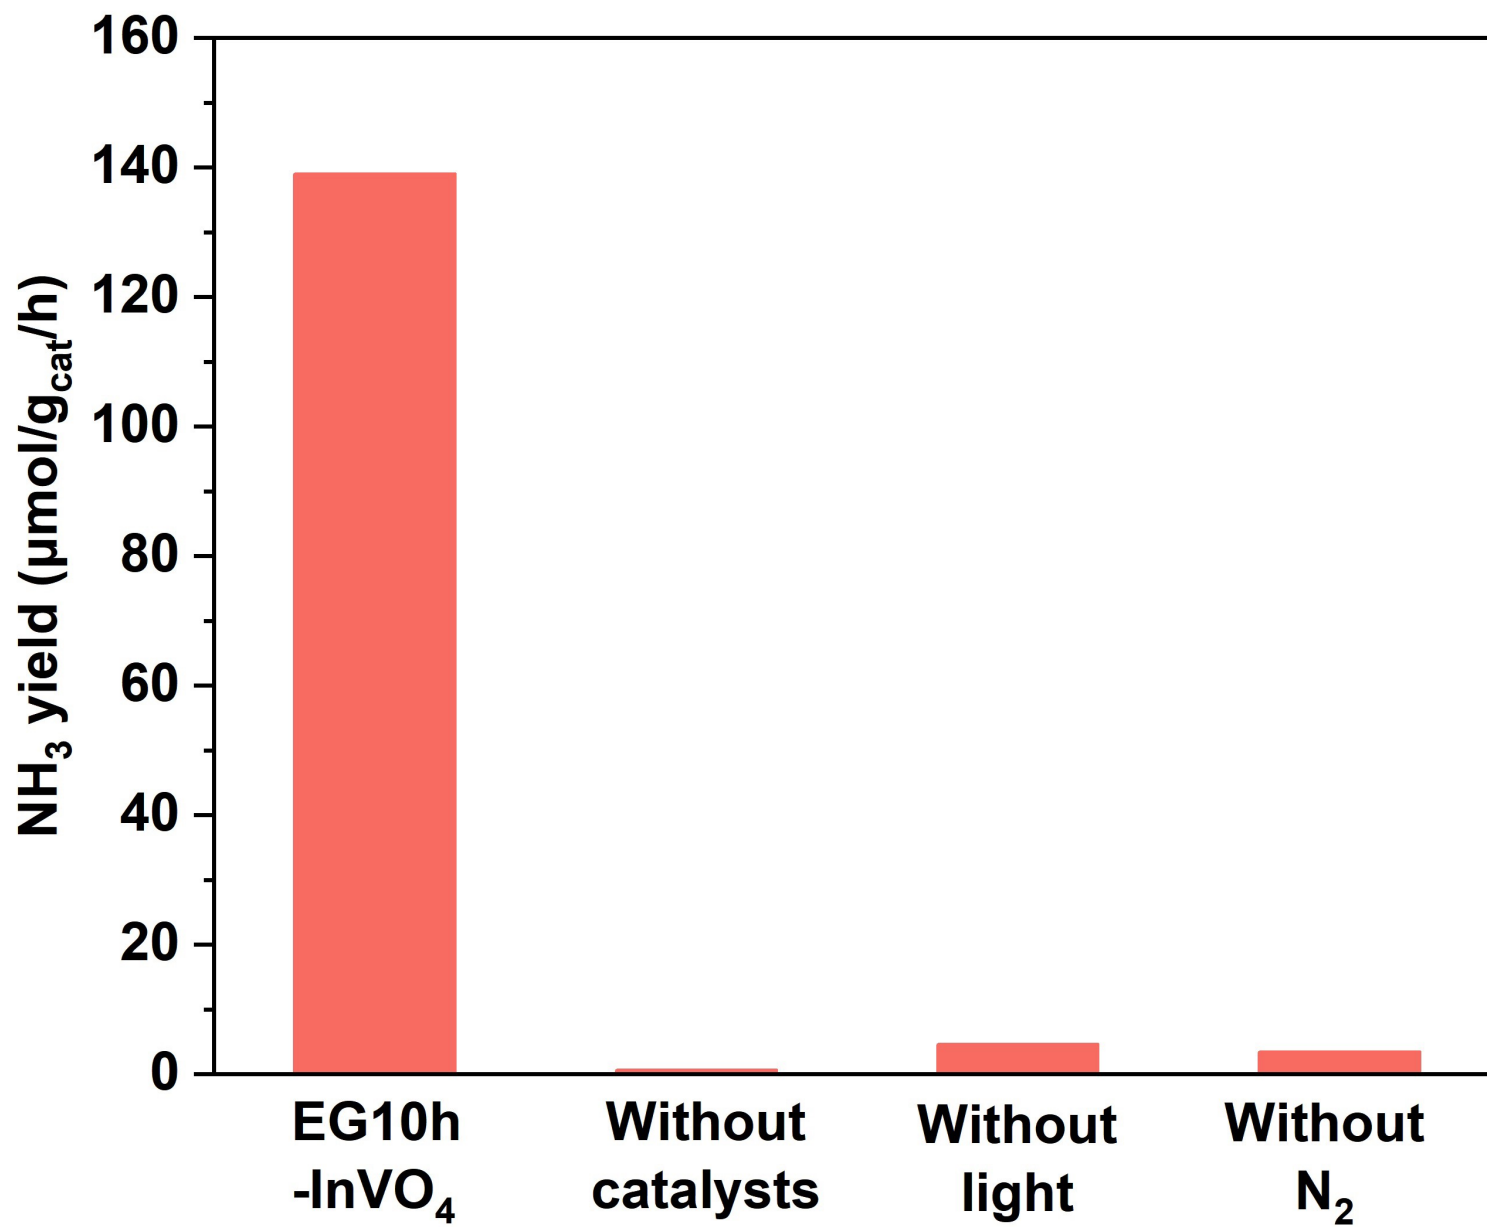

Supplement: d2en00205a6.pdf [file d2en00205a6.pdf]

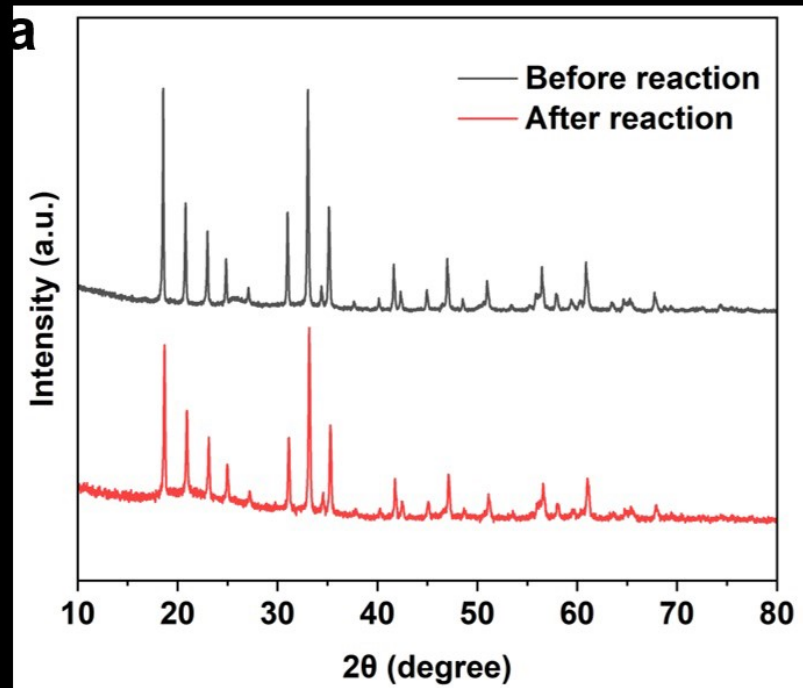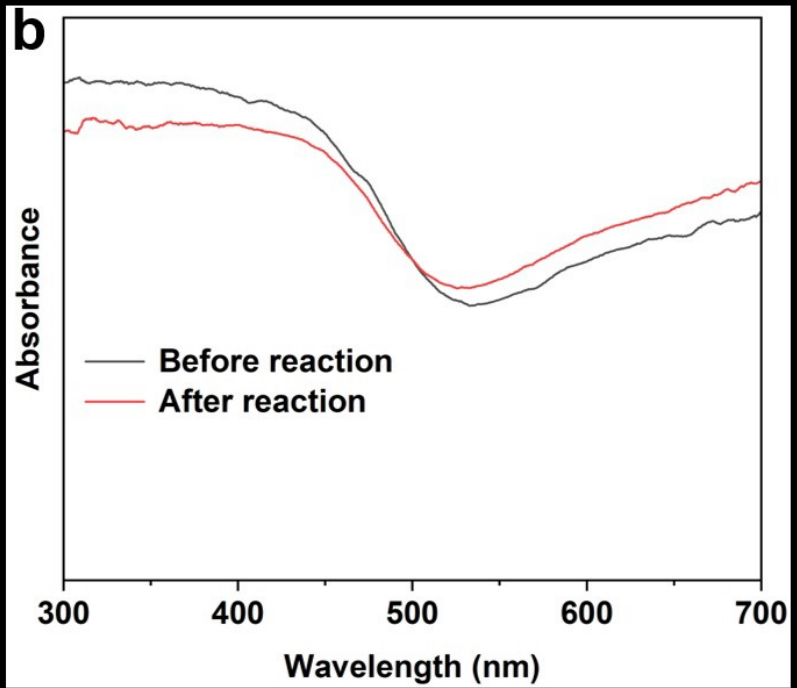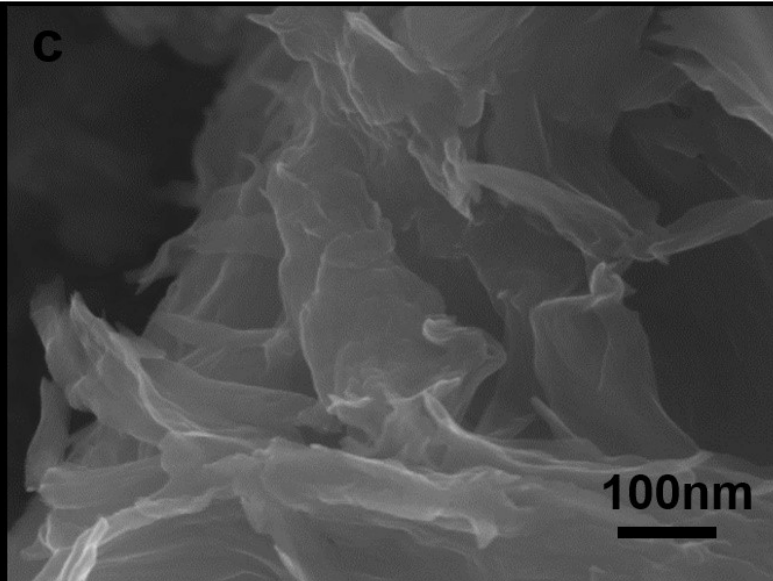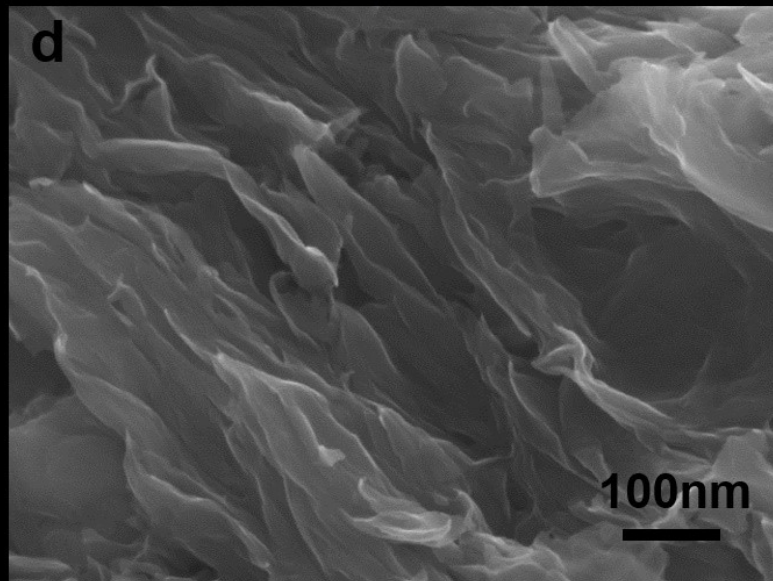

Supplement: d2en00205a7.pdf [file d2en00205a7.pdf]

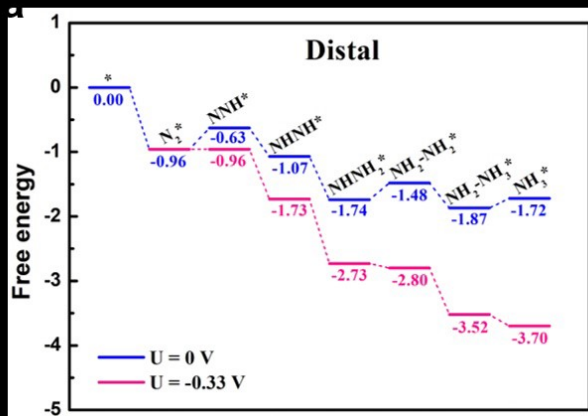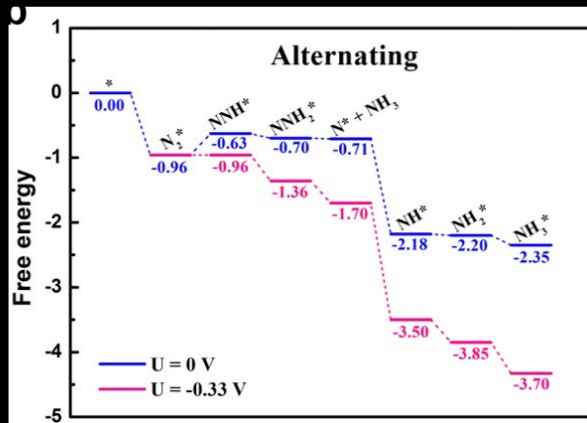

Supplement: d2en00205a8.pdf [file d2en00205a8.pdf]

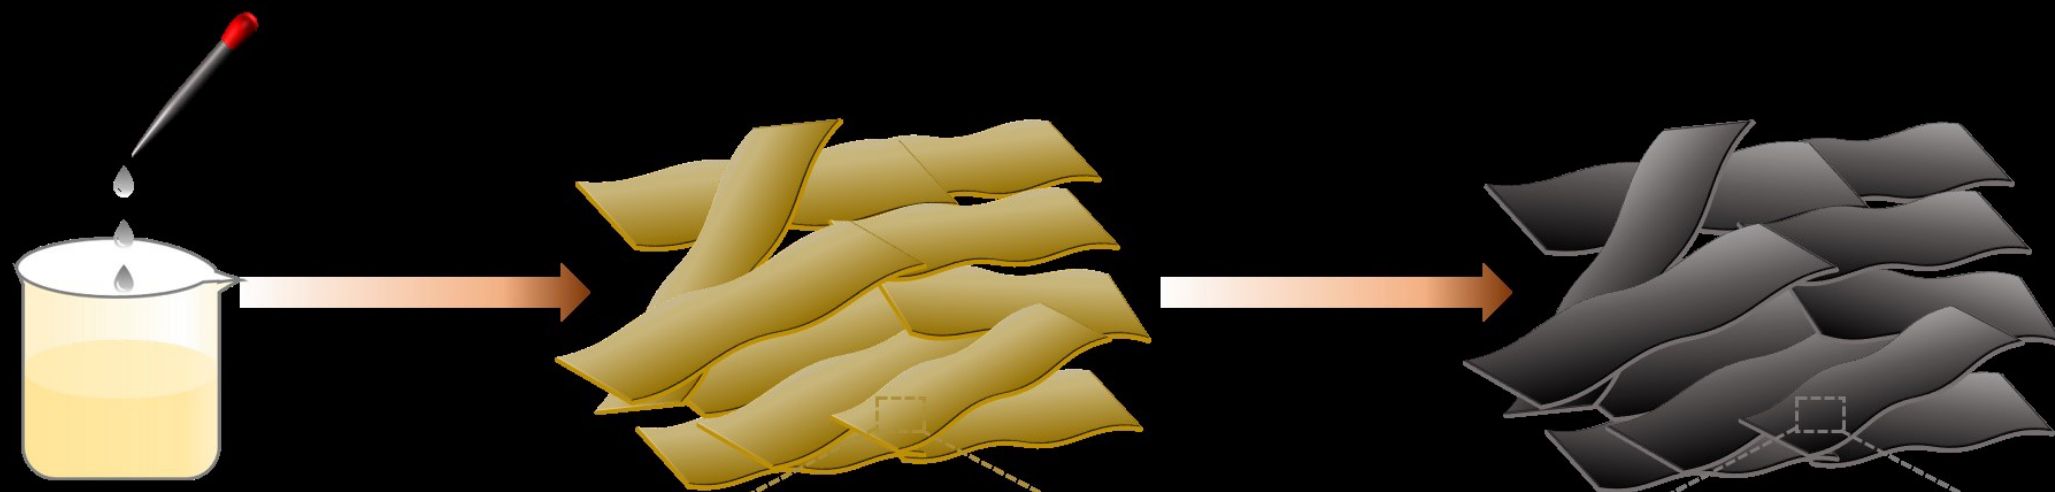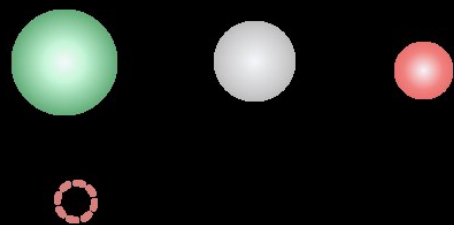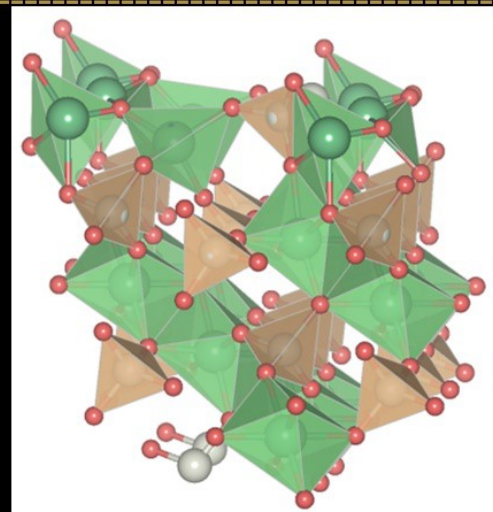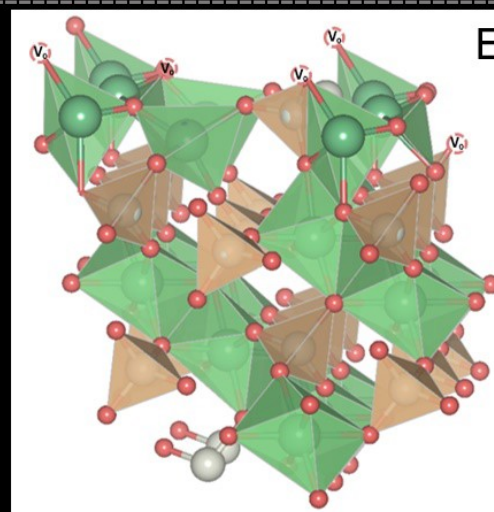

Supplement: d2en00205a9.pdf [file d2en00205a9.pdf]
